# Supplementary material for: Constitutively active MyD88/CD40 costimulation enhances expansion and efficacy of chimeric antigen receptor T cells targeting hematological malignancies
Source: PubMed Central journal article supplement (PMC6756044; doi:10.1038/s41375-019-0417-9), 2019-02-28
Supplement: 41375_2019_417_MOESM1_ESM.pdf [file 41375_2019_417_MOESM1_ESM.pdf]

# Supplementary Figure 1

**A**

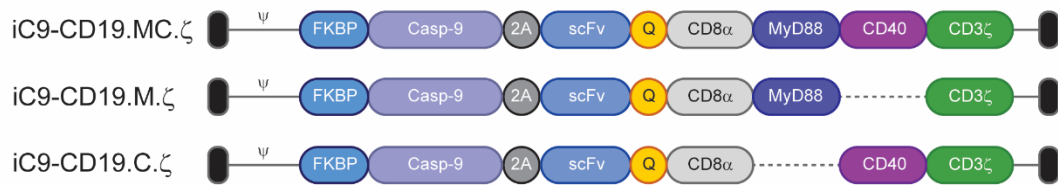

**B**

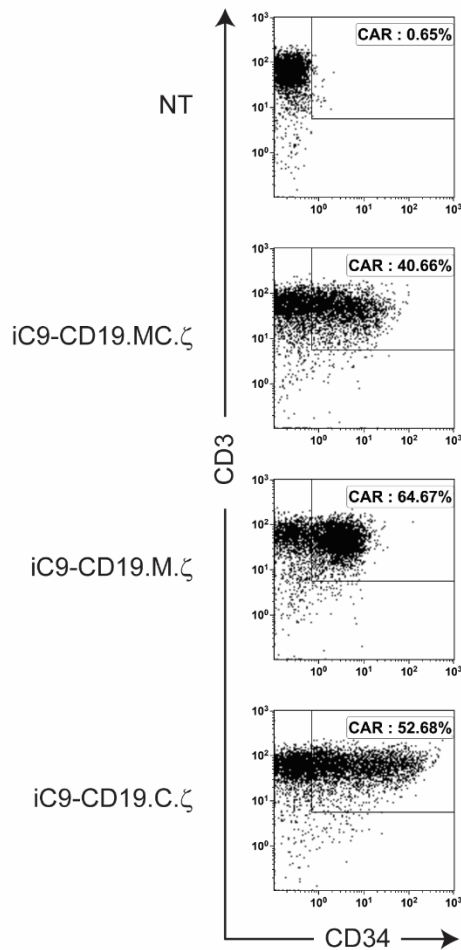

**C**

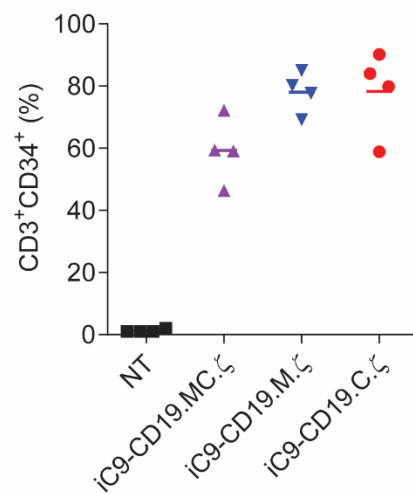

**D**

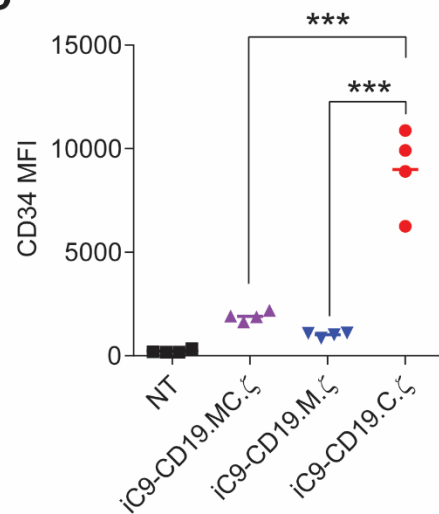

**Supplementary Figure 1. *In cis* MyD88 architecture lowers CAR expression. A)** To assess the impact of MC expression in CAR molecules, vectors were designed to encode MC, MyD88 (M) or CD40 (C) together with the cytoplasmic CD3ζ signaling domain. **B)** CAR expression was assessed by flow cytometry demonstrating that while transduction efficiency was unaffected, CAR levels were diminished by the inclusion of the MyD88 signaling domain. \*\*\* represents a P-value of <0.005.

## Supplementary Figure 2

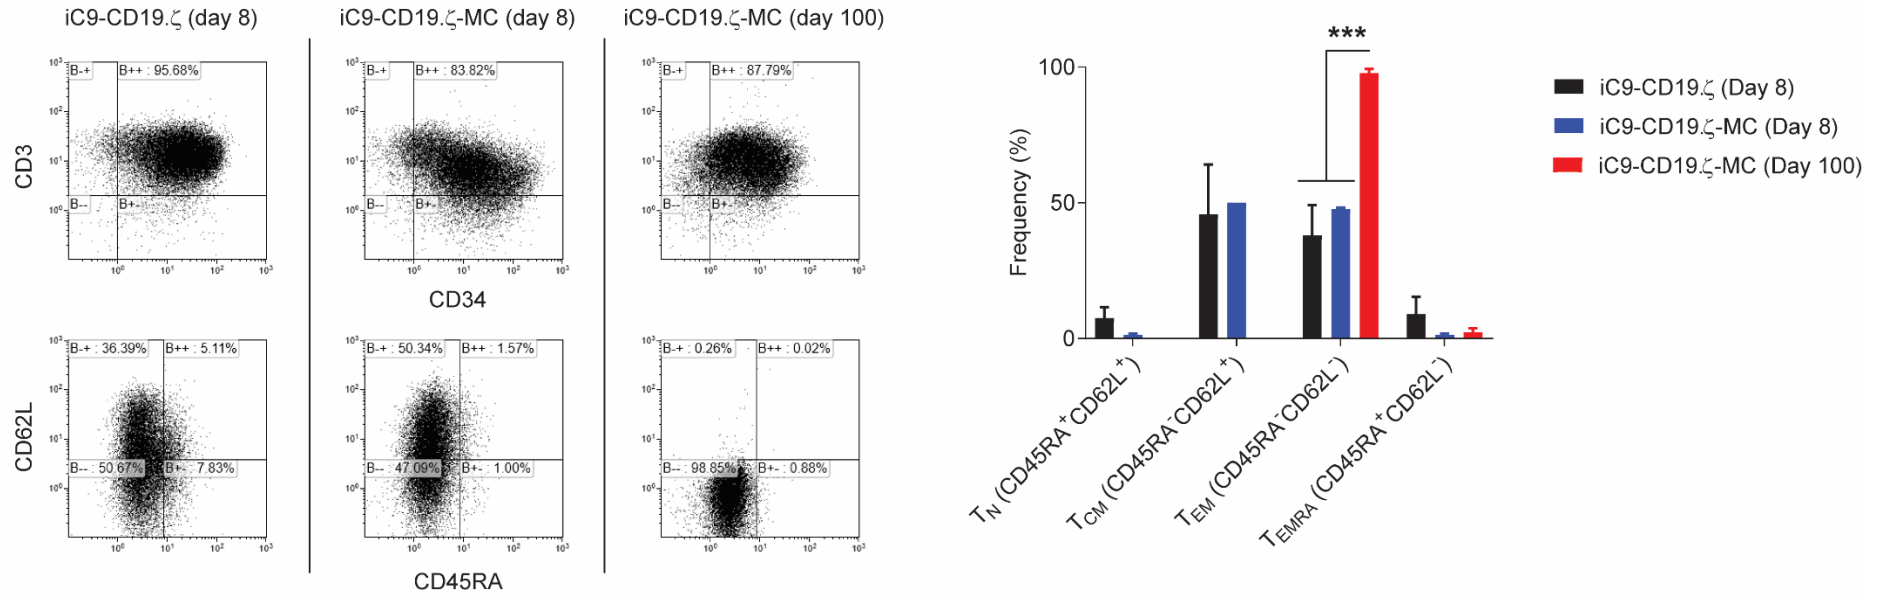

**Supplementary Figure 2. Memory phenotype of modified T cells.** Flow cytometric analysis of the memory phenotype using CD62L and CD45RA antibody staining for iC9-CD19.ζ and iC9-CD19.ζ-MC-modified T cells at day 8 and day 100 (iC9-CD19.ζ-MC) culture cells.

## Supplementary Figure 3

**A**

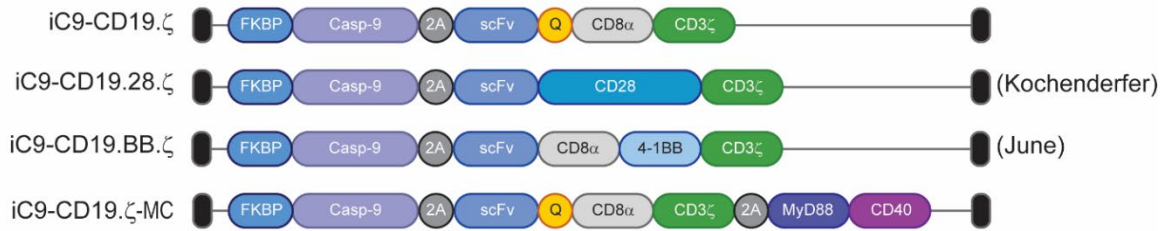

**B**

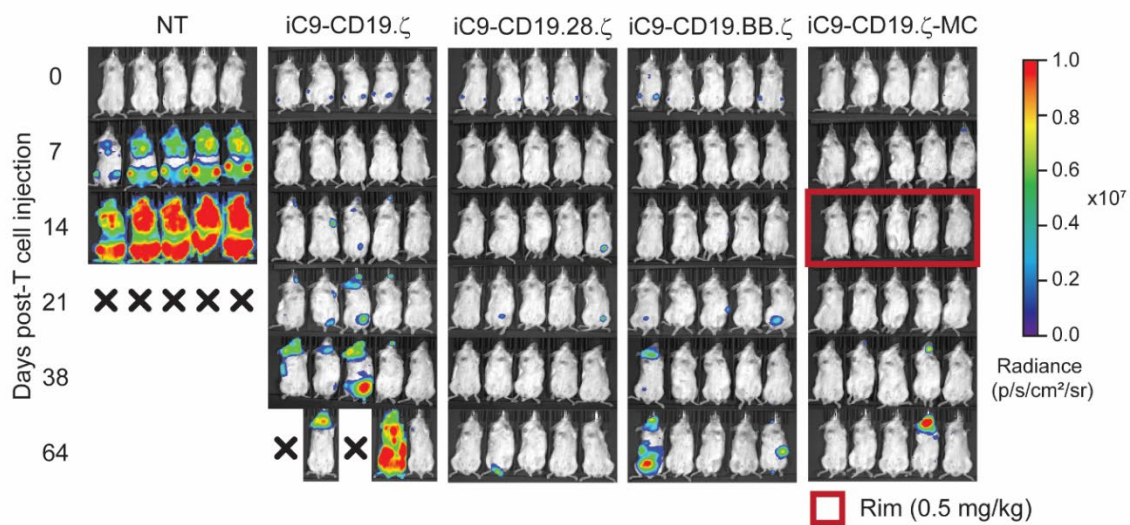

**C**

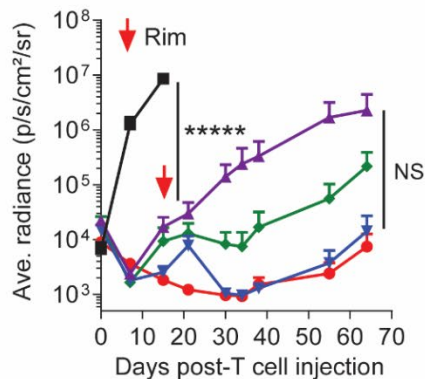

**D**

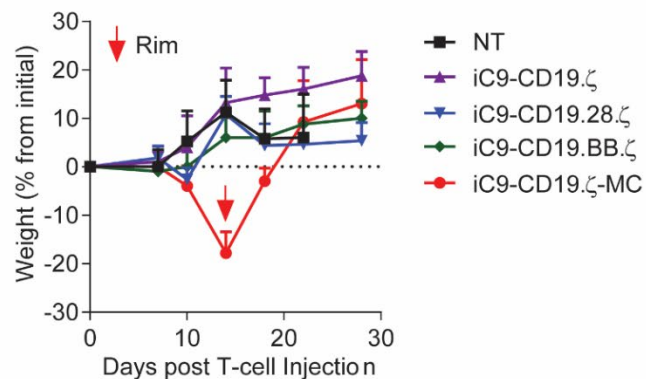

**Supplementary Figure 3. MC-enhanced CAR-T cells show robust anti-tumor activity compared to CAR-T cells bearing CD28 and 4-1BB endodomains. A)** Additional CD19-specific CAR constructs containing iC9 were developed using the CD28 and 4-1BB endodomains. Mice were engrafted with CD19<sup>+</sup> Raji-EGFP<sub>Luc</sub> tumor cells and subsequently treated with non-transduced (NT) or CAR-modified T cells 7 days post-tumor engraftment. **B and C)** Tumor growth was measured by bioluminescent imaging on a weekly basis. **D)** Mice treated with iC9-CD19.ζ-MC-modified T cells were treated with 0.5 mg/kg rimiducid on day 12 (red arrow) to resolve acute CAR-related weight loss.

## Supplementary Figure 4

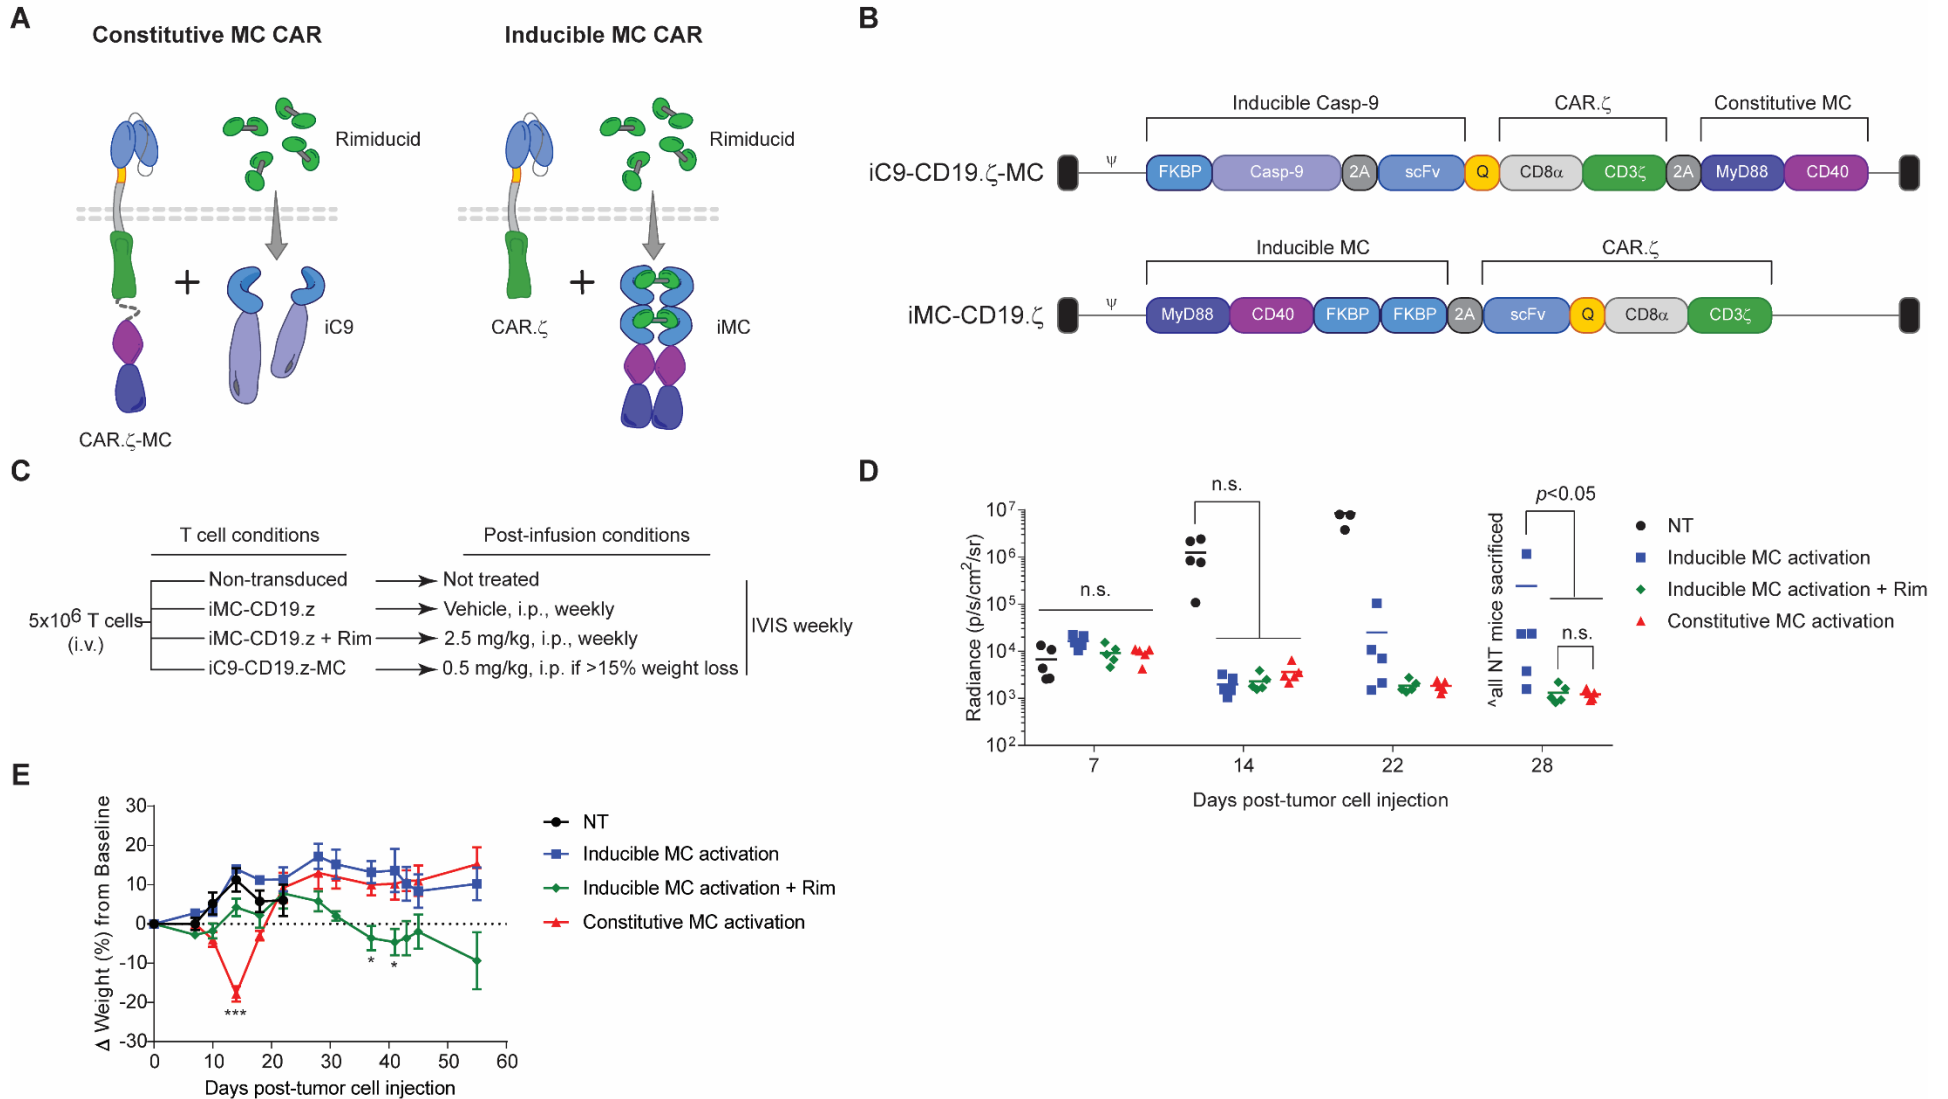

**Supplementary Figure 4. High basal activity from constitutive MC expression shows similar anti-tumor activity to an inducible MC system against CD19<sup>+</sup> tumor cells. A)** Schematic comparing two CAR systems using constitutively active MC versus rimiducid-dependent MC dimerization to provide MC stimulation. **B)** Comparison of iC9-CD19.ζ-MC and iMC-CD19.ζ constructs. The details of iC9-CD19.ζ-MC have been described in Figure 2. iMC is comprised of two tandem FKBP12 binding domains cloned in frame with the MyD88 and CD40 signaling domains. The CD19-specific

CAR is identical to the iC9-CD19.ζ-MC CAR. **C)** NSG mice were injected with  $5 \times 10^5$  Raji-EGFP<sub>luc</sub> tumor cells via tail vein injection. After 4 days, mice received NT T cells or T cells transduced with either the iMC-CD19.ζ or iC9-CD19.ζ-MC retroviral vector at a single dose of  $5 \times 10^6$  cells per mouse. In one group that received iMC-CD19.ζ-modified T cells, the mice received weekly injections of rimiducid through an i.p. injection of 5 mg/kg starting on day +1 post-T cell injection. **D)** *In vivo* imaging was performed to measure tumor growth using luciferase bioluminescence. **E)** Weights were tracked as a percent of the initial baseline measurement for each animal. Statistical comparisons to Inducible MC activation. \* represents a P-value <0.05, \*\*\* represents a P-value <0.005.

## Supplementary Figure 5

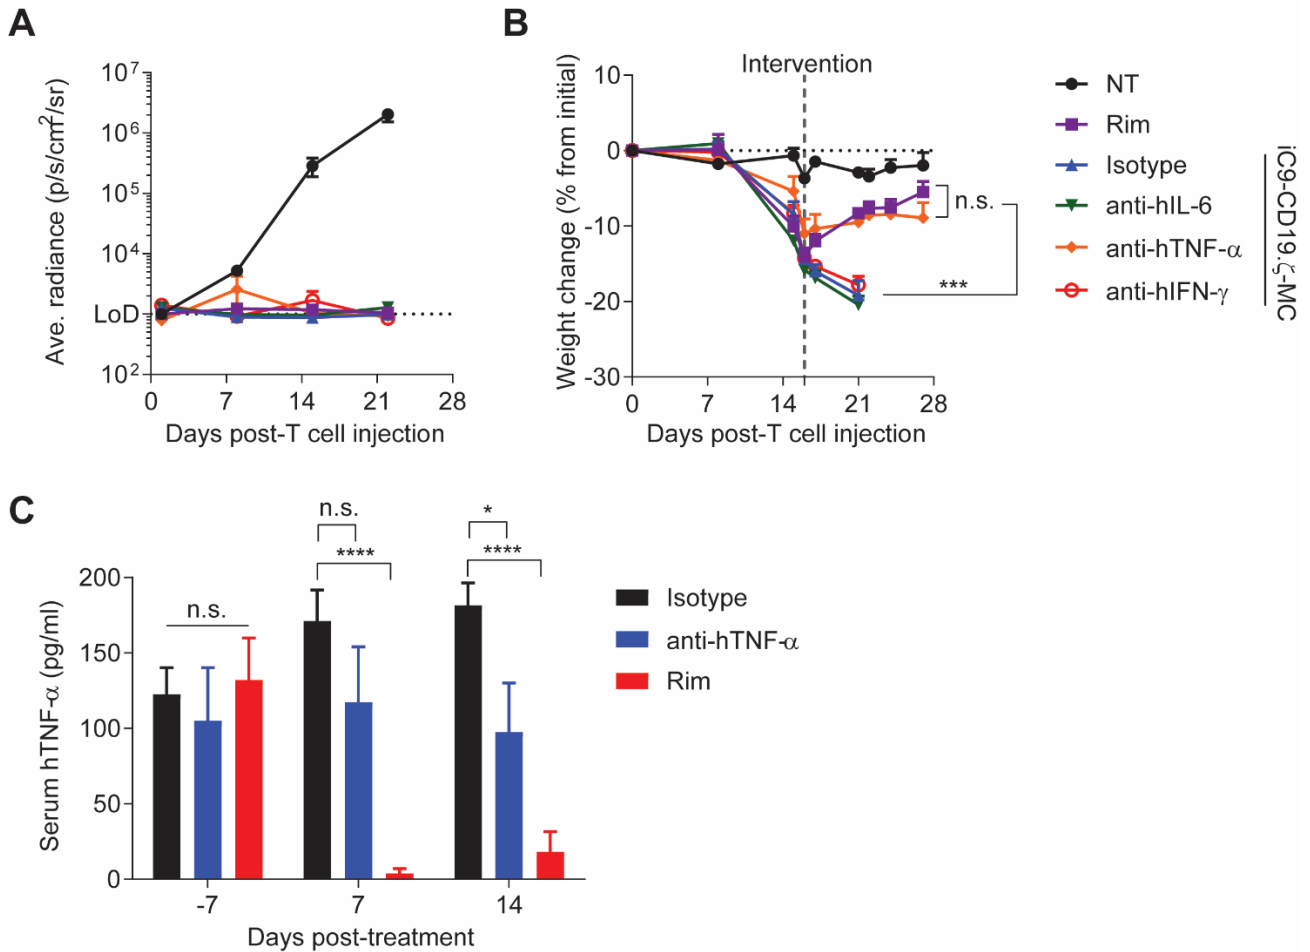

**Supplementary Figure 5. CAR-T cell cytokine production responsible for murine toxicity.** NSG mice engrafted with CD19<sup>+</sup> Raji-EGFP<sub>Luc</sub> tumor cells were treated with  $5 \times 10^6$  non-transduced (NT) or iC9-CD19. $\zeta$ -MC-modified T cells. Mice receiving CAR-T cells were subsequently treated by twice weekly i.p. Injections of neutralizing antibodies to hIFN- $\gamma$ , hIL-6 or hTNF- $\alpha$ , or a control non-specific isotype antibody after >10% weight loss was observed (day 15). As a control, one group was given 5 mg/kg rimiducid to resolve toxicity. **A**) Tumor growth was measured by bioluminescent imaging (BLI) and **B**) CAR-dependent toxicity by measuring weight loss. **C**) Serum concentration of hTNF- $\alpha$  was measured on days -7, 7, and 14 post-administration of neutralizing antibody cycle.

## Supplementary Figure 6

**A**

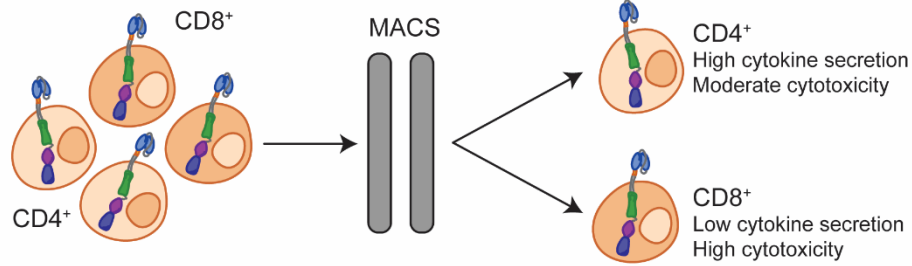

**B**

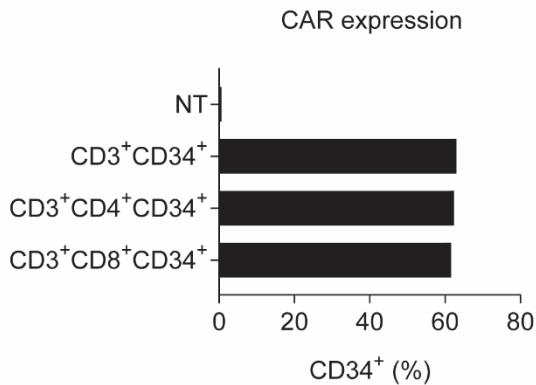

**C**

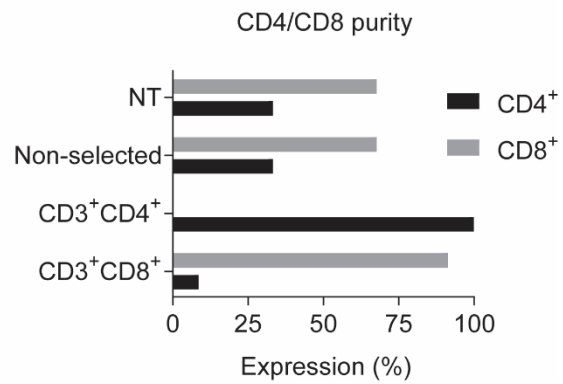

**Supplementary Figure 6. T cell subset selection for minimizing cytokine production from T cells engineered with iC9-CAR.z-MC vectors. A)** Transduced T cells forming a bulk population containing both CD4<sup>+</sup> (high cytokine producers) and CD8<sup>+</sup> (low cytokine production) were purified for either CD4 or CD8 expression using MACS columns. **B)** CAR expression of non-transduced (NT), unselected or CD4 and CD8-selected CAR-T cells. **C)** Purity of unselected and selected CAR-T cells.
